# Supplementary material for: Assessing the impact of heat stress on growth faltering in the first 1000 days of life in rural Gambia
Source: Research Square preprint supplement (doi:10.21203/rs.3.rs-2358038/v1), 2023-01-09
Supplement: Supplementary file 1 [file 0a0928650237b62ffbfd644f.docx]

Supplementary material

Assessing the impact of heat stress on growth faltering in the first 1000 days of life in rural Gambia.

Ana Bonell, Ana M Vicedo-Cabrera, Kris A Murray, Giovenale Moirano, Bakary Sonko, Sophie E Moore, Andy Haines, Andrew M Prentice

Contents:

| Fig 1: Mean weight-for-age z-score by month (in utero) | 2 |
| --- | --- |
| Fig 2: Mean weight-for-age z-score by month (0-2 years) | 2 |
| Fig 3: Mean weight-for-height z-score by month (0-2 years) | 3 |
| Fig 4: Mean height-for-weight z-score by month (0-2 years) | 3 |
| Fig 5: Individual weight and weight-for-age z-score trajectories 0-2 years | 4 |
| Fig 6: Heat stress by date and village | 4 |
| Table 1: Full results of multivariate multilevel model in utero | 5 |
| Table 2: Full results of multivariate multilevel model 0-2 years | 6 |
| Fig 7: Estimates for 30 day heat stress exposure on growth faltering metrics | 7 |
| Fig 8: Estimates for 90 day heat stress exposure on growth faltering metrics | 7 |
| R code | 8 |

Exploration of seasonality:

**Figure 1: Plot of mean weight-for-age z-score in utero by month.**

**Figure 2: Plot of mean weight-for-age z-score from 0-2 years by month.**

**Figure 3: Plot of mean weight-for-height z-score from 0-2 years by month.**

**Figure 4: Plot of mean height-for-age z-score from 0-2 years by month.**

**Figure 5: plots of individual weight trajectories 0-2 years and individual weight-for-age z-scores 0-2 years over time**


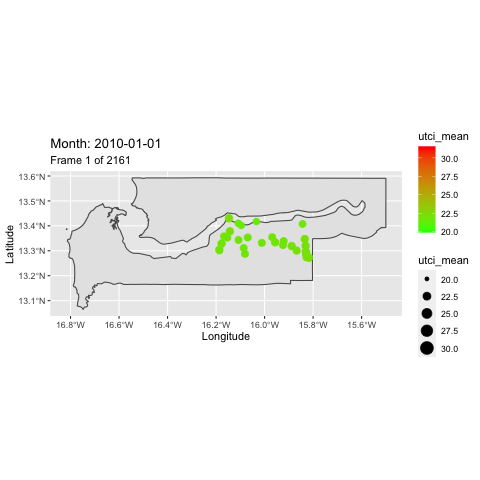


**Figure 6 – GIF of heat by village over time (2010-2015)**

**Table 1: In utero multivariate multilevel model of WAZ with heat stress exposure defined as average UTCI exposure for the 60 days prior to each visit.**

| **Variables** | **Estimate (95% CI)** | **p-value on LRT** |
| --- | --- | --- |
| ***Maternal factors*** |  |  |
| Maternal age | 3.74 x 10-7 (-4.1 x 10-5;4.2 x 10-5) | 0.99 |
| Enrolment BMI | 5.99 x 10-2 (2.7 x 10-2; 9.3 x 10-2) | <0.001 |
| MUAC | -4.10 x 10-2 (-7.7 x 10-2;-5.4 x 10-3) | 0.02 |
| Parity | -3.83 x 10-4 (-3.6 x 10-2;3.5 x 10-2 | 0.98 |
| ***Child-level factors*** |  |  |
| Age | -4.27 x 10-3 (-5.2 x 10-3;-3.4 x 10-3) | <0.001 |
| Sex | 6.21 x 10-2 (-4.4 x 10-2;0.17) | 0.26 |
| ***Environmental factors*** |  |  |
| Cubic spline UTCI | -0.17 (-0.70;0.37) | 0.83 |
| 5.65 x 10-2 (-0.22;0.33) |
| 8.15 x 10-3 (-0.38;0.39) |
| Season of conception | 0.12 (-1.0 x 10-2;0.25) | 0.07 |
| Season of exposure | -9.27 x 10-3 (-0.18;0.16) | 0.92 |

**Table 2: Multilevel model of weight-for-age, height-for-age and weight-for-height and heat stress defined as mean UTCI exposure 60 days prior to each measurement**

|  | **WAZ 0-2 years** | | **HAZ 0-2 years** | | **WHZ 0-2 years** | |
| --- | --- | --- | --- | --- | --- | --- |
| **Variables** | **Estimate (95% CI)** | **p-value** | **Estimate (95% CI)** | **p-value** | **Estimate (95% CI)** | **p-value** |
| ***Maternal factors*** | | | | | | |
| Maternal age | -0.00 (-0.00;-0.00) | 0.512 | -0.00 (-0.00;0.00) | 0.236 | -0.00 (-0.00;-0.00) | 0.015 |
| Enrolment BMI | 0.04 (0.02;0.06) | <0.001 | 0.00 (-0.02;0.02) | 0.690 | 0.05 (0.03;0.07) | <0.001 |
| Parity | -0.01 (-0.05;0.02) | 0.465 | -0.03 (-0.07;0.01) | 0.124 | -0.00 (-0.04;0.04) | 0.880 |
| ***Child-level factors*** | | | | | | |
| GA at birth | 0.01 (0.00;0.01) | 0.011 | 0.02 (0.01; 0.02) | <0.001 | -0.00 (-0.00;0.00) | 0.996 |
| Age | -0.04 (-0.04; -0.03) | <0.001 | -0.04 (-0.05;-0.03) | <0.001 | -0.03 (-0.04;-0.03) | <0.001 |
| Sex | -0.18 (-0.29;-0.05) | 0.005 | -0.20 (-0.32;-0.07) | 0.003 | -0.10 (-0.22;0.02) | 0.114 |
| Acute illness in last 4 weeks | -0.07 (-0.11;-0.02) | 0.002 | 0.05 (0.01;0.09) | 0.007 | -0.10 (-0.16;-0.05) | <0.001 |
| ***Environmental factors*** | | | | | | |
| Cubic spline UTCI | 0.18 (0.00;0.35) | 0.004 | 0.32 (0.15;0.49) | <0.001 | 0.00 (-0.22;0.22) | <0.001 |
| 0.04 (-0.08;0.15) | 0.37 (0.26;0.48) | -0.30 (-0.45;-0.16) |
| -0.07 (-0.24;0.10) | 0.29 (0.12;0.45) | -0.44 (-0.65;-0.22) |
| Season of conception | -0.02 (-0.14;0.14) | 0.858 | -0.05 (-0.19;0.08) | 0.435 | 0.06 (-0.06;0.20) | 0.318 |
| Season of exposure | -0.76 (-1.47;-0.05) | 0.036 | -0.17 (-2.39;-0.93) | <0.001 | 0.81 (-0.06;1.68) | 0.127 |
| -0.38 (-0.85; 0.08) | -0.93 (-1.39;-0.46 | 0.43 (-0.14;0.99) |
| Year | 0.19 (0.07;0.30) | 0.002 | 0.26 (0.15;0.37) | <0.001 | -0.00 (-0.15;0.15) | 0.991 |
| ***Model parameters*** | | | | | | |
| VPC(treatment) | 0.00 |  | 0.00 |  | 0.00 |  |
| VPC(village) | 0.01 |  | 0.02 |  | 0.01 |  |
| VPC(individual) | 0.60 |  | 0.67 |  | 0.50 |  |
| VPC(residual) | 0.39 |  | 0.31 |  | 0.49 |  |
| AIC | 11027 |  | 9211 |  | 10997 |  |
| Scaled residuals | Median 0.02 (range -4.00;3.94) |  | Median 0.02 (range -5.44;6.17) |  | Median 0.04 (range -4.29;4.17) |  |

WAZ = weight-for-age z-score; HAZ = height-for-age z-score; WHZ = weight-for-height z-score; BMI = body mass index; GA = gestational age; UTCI = universal thermal climate index; VPC = variance partition coefficient; AIC = Akaike Information Criterion

**Figure 7: Adjusted association between weight-for-age z-scores, weight-for-height z-score and height-for-age z-score and mean UTCI over 30-day summaries in 0-2 year-olds.**

**Figure 8: Adjusted association between weight-for-age z-scores, weight-for-height z-score and height-for-age z-score and mean UTCI over 90-day summaries in 0-2 year-olds.**

**R code:**

## code is presented – first for the in utero model and then for the infant model. Lines of code can be run directly in R. ## indicates annotation to code.

#### packages ####

library(tidyverse)

library(magrittr)

library(sitar)

library(lme4)

library(dlnm)

library(rstatix)

library(splines)

#### data #####

utero_formodel <- readRDS("~/utero_formodel.rds")

utero_formodel %<>% convert_as_factor(ID, SUPPLEMENTGROUP, InfantSex, VillageName)

#### set the splines ####

get_utknots <- function(x){

quantile(x, c(0.5), na.rm=T)

}

knot30mean <- get_utknots(utero_formodel$utci_mean_30)

knot60mean <- get_utknots(utero_formodel$utci_mean_60)

knot90mean <- get_utknots(utero_formodel$utci_mean_90)

#### get one basis object ####

ob_30mean <- onebasis(utero_formodel$utci_mean_30, fun="bs", degree=2, knots = knot30mean)

ob_60mean <- onebasis(utero_formodel$utci_mean_60, fun="bs", degree=2, knots = knot60mean)

ob_90mean <- onebasis(utero_formodel$utci_mean_90, fun="bs", degree=2, knots = knot90mean)

#### run the models ####

mod_30mean <- lmer(zscore ~ age + ob_30mean + Maternal_age + season_15 + InfantSex +

season_conc + muac + BMI + parity + (1|SUPPLEMENTGROUP) +

(1|VillageName) + (1|ID), data = utero_formodel)

mod_60mean <- lmer(zscore ~ age + ob_60mean + Maternal_age + season_30 + InfantSex +

season_conc + muac + BMI + parity + (1|SUPPLEMENTGROUP) +

(1|VillageName) + (1|ID), data = utero_formodel)

mod_90mean <- lmer(zscore ~ age + ob_90mean + Maternal_age + season_45 + InfantSex +

season_conc + muac + BMI + parity + (1|SUPPLEMENTGROUP) +

(1|VillageName) + (1|ID), data = utero_formodel)

#### crosspred ####

vis_30mean <- crosspred(ob_30mean, mod_30mean, cen = 26)

vis_60mean <- crosspred(ob_60mean, mod_60mean, cen = 26)

vis_90mean <- crosspred(ob_90mean, mod_90mean, cen = 26)

#### plots ####

plot(vis_30mean)

plot(vis_60mean)

plot(vis_90mean)

get_meanplots <- function(x){

plot(x, ylim=c(-0.4, 0.4) ,xlab = expression(paste("Mean UTCI (",degree,"C)")),

ylab = "WAZ",

col = "dark red")

}

# plots for fig 2 #

par(mfrow=c(1,3))

get_meanplots(vis_30mean)

title(main= "30 Days Exposure")

get_meanplots(vis_60mean)

title(main= "60 Days Exposure")

get_meanplots(vis_90mean)

title(main= "90 Days Exposure")

## code below runs the models for the 0-2 years ##

#### data #####

joined <- readRDS("~/joined.rds")

joined %<>% convert_as_factor(ID, SUPPLEMENTGROUP, InfantSex, VillageName)

#### set the splines ####

# already tested in other scripts - just need 0.5 knot and BS spline

get_knots <- function(x){

quantile(x, c(0.5), na.rm=T)

}

knot30mean <- get_knots(joined$utci_mean_30)

knot60mean <- get_knots(joined$utci_mean_60)

knot90mean <- get_knots(joined$utci_mean_90)

#### get onebasis objects for all ####

ob_30mean <- onebasis(joined$utci_mean_30, fun="bs", degree=2, knots = knot30mean)

ob_60mean <- onebasis(joined$utci_mean_60, fun="bs", degree=2, knots = knot60mean)

ob_90mean <- onebasis(joined$utci_mean_90, fun="bs", degree=2, knots = knot90mean)

#### WAZ models ####

## any illness in last 4 weeks ##

joined$year <- year(joined$visdate.x)

mod_waz30mean <- lmer(waz ~ age_mth + ob_30mean + Maternal_age + ns(visdate.x, 2) + InfantSex

+ sickany4week + year + GA_atbirth + season_conc + BMI + parity + (1|SUPPLEMENTGROUP)

+ (1|ID) + (1|VillageName), data = joined)

mod_waz60mean <- lmer(waz ~ age_mth + ob_60mean + Maternal_age + ns(visdate.x, 2) + InfantSex

+ sickany4week + year + GA_atbirth + season_conc + BMI + parity + (1|SUPPLEMENTGROUP)

+ (1|ID) + (1|VillageName), data = joined)

mod_waz90mean <- lmer(waz ~ age_mth + ob_90mean + Maternal_age + ns(visdate.x, 2) + InfantSex

+ sickany4week + year + GA_atbirth + season_conc + BMI + parity + (1|SUPPLEMENTGROUP)

+ (1|ID) + (1|VillageName), data = joined)

vis_waz30mean <- crosspred(ob_30mean, mod_waz30mean, cen = 26)

vis_waz60mean <- crosspred(ob_60mean, mod_waz60mean, cen = 26)

vis_waz90mean <- crosspred(ob_90mean, mod_waz90mean, cen = 26)

plot(vis_waz30mean)

plot(vis_waz60mean)

plot(vis_waz90mean)

#### WHZ models ####

mod_whz30mean <- lmer(whz ~ age_mth + ob_30mean + Maternal_age + ns(visdate.x, 2) + InfantSex

+ year + sickany4week + GA_atbirth + season_conc + BMI + parity + (1|SUPPLEMENTGROUP)

+ (1|ID) + (1|VillageName), data = joined)

mod_whz60mean <- lmer(whz ~ age_mth + ob_60mean + Maternal_age + ns(visdate.x, 2) + InfantSex

+ year + sickany4week + GA_atbirth + season_conc + BMI + parity + (1|SUPPLEMENTGROUP)

+ (1|ID) + (1|VillageName), data = joined)

mod_whz90mean <- lmer(whz ~ age_mth + ob_90mean + Maternal_age + ns(visdate.x, 2) + InfantSex

+ year + sickany4week + GA_atbirth + season_conc + BMI + parity + (1|SUPPLEMENTGROUP)

+ (1|ID) + (1|VillageName), data = joined)

vis_whz30mean <- crosspred(ob_30mean, mod_whz30mean, cen = 28.1)

vis_whz60mean <- crosspred(ob_60mean, mod_whz60mean, cen = 28.1)

vis_whz90mean <- crosspred(ob_90mean, mod_whz90mean, cen = 28.1)

plot(vis_whz30mean)

plot(vis_whz60mean)

plot(vis_whz90mean)

#### HAZ models ####

mod_haz30mean <- lmer(haz ~ age_mth + ob_30mean + Maternal_age + ns(visdate.x, 2) + InfantSex

+ year + sickany4week + GA_atbirth + season_conc + BMI + parity + (1|SUPPLEMENTGROUP)

+ (1|ID) + (1|VillageName), data = joined)

mod_haz60mean <- lmer(haz ~ age_mth + ob_60mean + Maternal_age + ns(visdate.x, 2) + InfantSex

+ year + sickany4week + GA_atbirth + season_conc + BMI + parity + (1|SUPPLEMENTGROUP)

+ (1|ID) + (1|VillageName), data = joined)

mod_haz90mean <- lmer(haz ~ age_mth + ob_90mean + Maternal_age + ns(visdate.x, 2) + InfantSex

+ year + sickany4week + GA_atbirth + season_conc + BMI + parity + (1|SUPPLEMENTGROUP)

+ (1|ID) + (1|VillageName), data = joined)

vis_haz30mean <- crosspred(ob_30mean, mod_haz30mean, cen = 26)

vis_haz60mean <- crosspred(ob_60mean, mod_haz60mean, cen = 26)

vis_haz90mean <- crosspred(ob_90mean, mod_haz90mean, cen = 26)

plot(vis_haz30mean)

plot(vis_haz60mean)

plot(vis_haz90mean)

get_hazplots <- function(x){

plot(x, ylim=c(-0.4, 0.1) ,xlab = expression(paste("UTCI (",degree,"C)")),

ylab = "HAZ",

col = "dark red")

}

get_whzplots <- function(x){

plot(x, ylim=c(-0.3, 0.3) ,xlab = expression(paste("UTCI (",degree,"C)")),

ylab = "WHZ",

col = "dark red")

}

get_wazplots <- function(x){

plot(x, ylim=c(-0.2, 0.1) ,xlab = expression(paste("UTCI (",degree,"C)")),

ylab = "WAZ",

col = "dark red")

}

par(mfrow=c(1,3))

get_wazplots(vis_waz30mean)

get_whzplots(vis_whz30mean)

get_hazplots(vis_haz30mean)

get_wazplots(vis_waz60mean)

title(main= "Weight-for-age z-score")

get_whzplots(vis_whz60mean)

title(main= "Weight-for-height z-score")

get_hazplots(vis_haz60mean)

title(main= "Height-for-age z-score")
